# Supplementary material for: Deficiency of T cell CD40L has minor beneficial effects on obesity-induced metabolic dysfunction
Source: PubMed Central journal article supplement — BMJ Open Diabetes Res Care. 2019 Dec 17;7(1):e000829. doi: 10.1136/bmjdrc-2019-000829 (PMC6936585; doi:10.1136/bmjdrc-2019-000829), 2019-12-17
Supplement: bmjdrc-2019-000829supp001.pdf [file bmjdrc-2019-000829supp001.pdf]

# Supplemental Figures

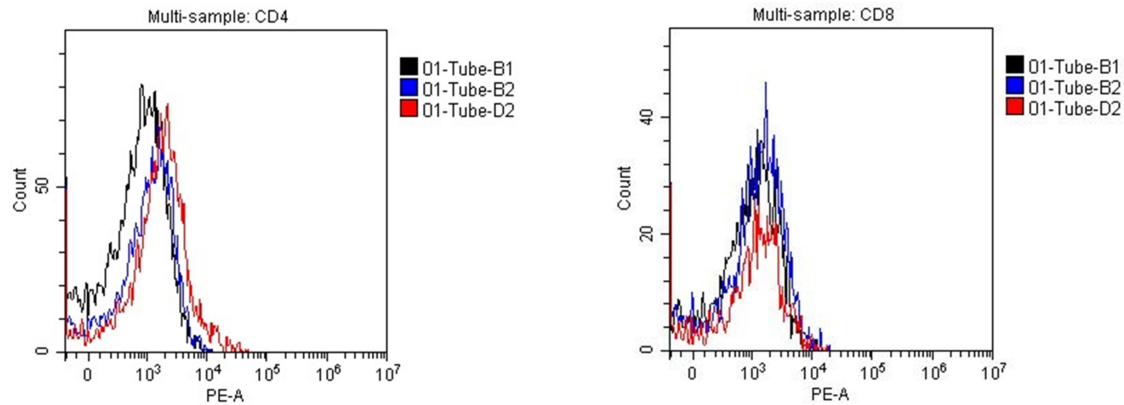

**Figure S1. CD40L depletion analysed by flow cytometry. (A)** CD40L expression on CD4 cells in PE, Tube-B1; unstimulated CD40L<sup>fl/fl</sup> WT, Tube-B2; 24 h stimulated CD4CreCD40L<sup>fl/fl</sup>, Tube-D2; 24 h stimulated CD40L<sup>fl/fl</sup> WT. **(B)** CD40L expression on CD8 cells in PE, Tube-B1; unstimulated CD40L<sup>fl/fl</sup> WT, Tube-B2; 24 h stimulated CD4CreCD40L<sup>fl/fl</sup>, Tube-D2; 24 h stimulated CD40L<sup>fl/fl</sup> WT.

| CD4 | Blanco Mean MFI | Stim 1 | Stim 2 | Average Stim - Blanco Mean | Average Cre vs WT | Knockout %   |
|-----|-----------------|--------|--------|----------------------------|-------------------|--------------|
| A   | 987,9           | 1567,6 | 1442,6 | 439,53                     |                   |              |
| B   | 1058,1          | 1409,3 | 1538,7 | 408,43                     |                   |              |
| C   | 1150,7          | 1408,8 | 1354,2 | 315,93                     | 387,97            |              |
| D   | 1535,3          | 2581   | 2815,4 | 1632,63                    |                   |              |
| E   | 1552,6          |        |        |                            |                   |              |
| F   | 1384,5          | 3015,2 | 2613,6 | 1748,83                    | 1690,733          | <b>77,05</b> |

**Table S1. CD40L depletion analysed by flow cytometry MFI mean.** Samples A-C are CD4CreCD40L<sup>fl/fl</sup> and samples D-F are CD40L<sup>fl/fl</sup> WT. Cells were unstimulated (Blanco) or stimulated in duplo (Stim1,2) for 24 h. and analysed for CD40L expression by flow-cytometry. Average blanco measurements (Cre) were deducted from the stimulated average, and CD4CreCD40L<sup>fl/fl</sup> vs WT were compared for the depletion efficiency.

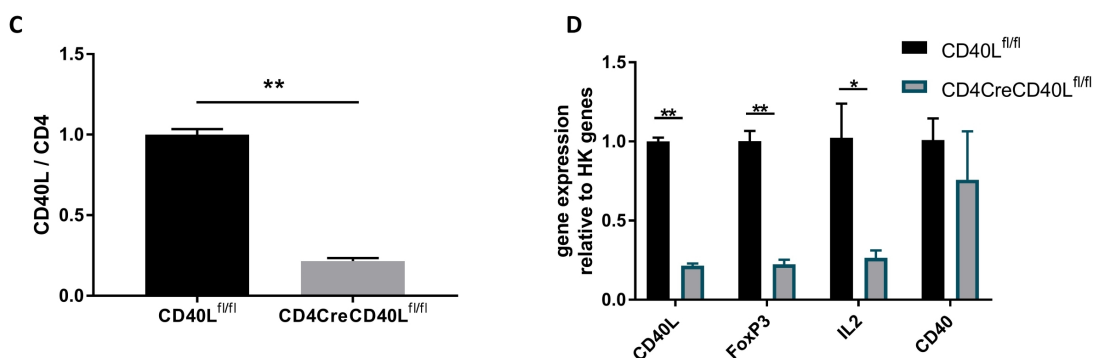

**Figure S1C/D. CD40L deletion measured by mRNA analysis. (C)** mRNA analysis of unstimulated CD4 cells show a 79% decrease in expression of CD40L. **(D)** mRNA expression of inflammatory markers in unstimulated CD4 cells, cyclo-a is used as the house keeping gene. Data is presented as n=3 mice/group, with mean ± SEM, \* = p<0.05, \*\* = p<0.01.
