# Supplementary material for: Deficiency of T cell CD40L has minor beneficial effects on obesity-induced metabolic dysfunction
Source: PubMed Central journal article supplement — BMJ Open Diabetes Res Care. 2019 Dec 17;7(1):e000829. doi: 10.1136/bmjdrc-2019-000829 (PMC6936585; doi:10.1136/bmjdrc-2019-000829), 2019-12-17
Supplement: bmjdrc-2019-000829supp002.pdf [file bmjdrc-2019-000829supp002.pdf]

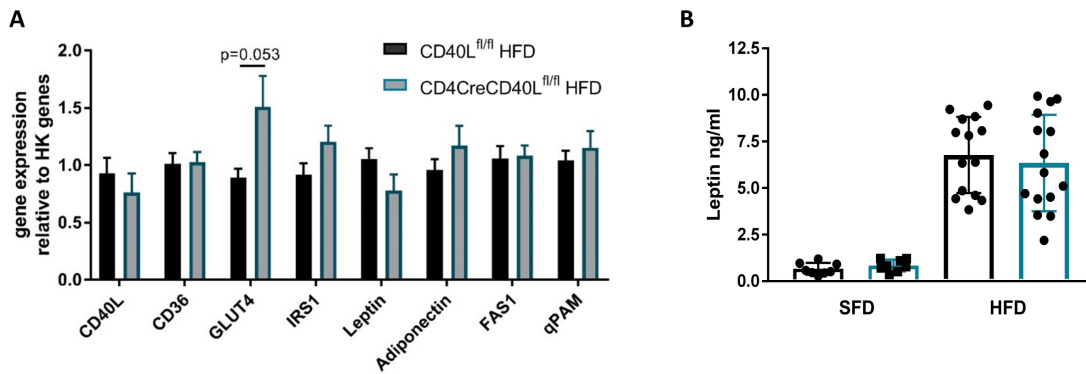

**Figure S2. EpAT metabolic markers are similar between T cell CD40L deficient and WT mice. (A)** mRNA expression relative to housekeeping (HK) genes. **(B)** Leptin concentration in plasma of SFD and HFD mice.

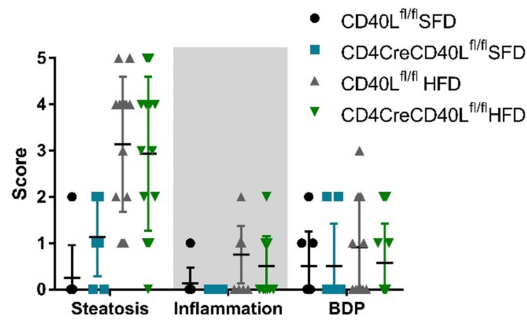

**Figure S3. Hepatic steatosis and inflammation are scored similar for T cell CD40L deficient and WT mice. (A)** Steatosis, inflammation and Bile Duct Proliferation (BDP) of the liver scored 0-5 for all groups.

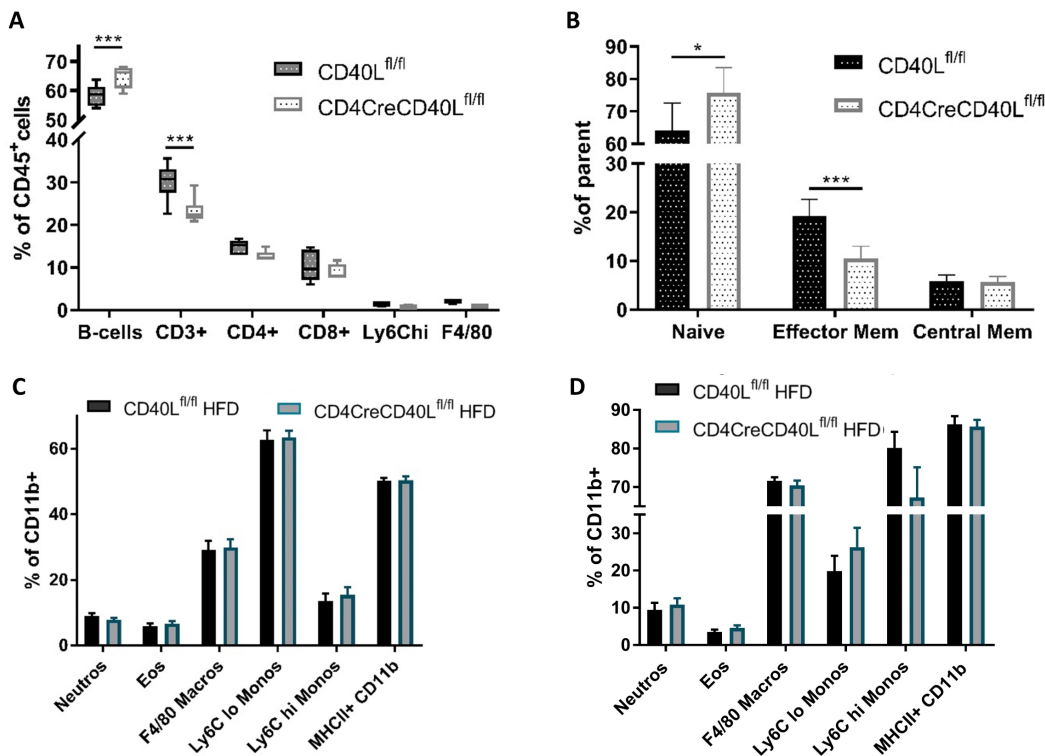

**Figure S4. Flow cytometric analysis of lymphoid and myeloid populations for CD4CreCD40L<sup>fl/fl</sup> and WT mice. (A)** Flow cytometric analysis of CD45<sup>+</sup> subsets in spleen of SFD mice. **(B)** Distribution of CD4<sup>+</sup> T cell subsets in spleen; CD62L<sup>+</sup> CD44<sup>-</sup> Naïve cells, CD62L<sup>+</sup> CD44<sup>+</sup> Central memory cells, and CD62L<sup>-</sup> CD44<sup>+</sup> Effector memory cells of SFD mice (n=6/group). **(C)** Flow cytometry analysis of CD11b<sup>+</sup> neutrophils, eosinophils, macrophages, Ly6C<sup>-</sup> lo and hi monocytes, and MHC-II<sup>+</sup> activation in myeloid population of spleen and **(D)** EpAT of HFD fed T cell CD40L deficient and WT mice. Data is represented as HFD (n=14 and 15/group) and SFD (n=8/group), mean  $\pm$  SD. \* = P<0.05, \*\* = P<0.01, \*\*\* = p<0.001
