# Supplementary material for: Deficiency of T cell CD40L has minor beneficial effects on obesity-induced metabolic dysfunction
Source: PubMed Central journal article supplement — BMJ Open Diabetes Res Care. 2019 Dec 17;7(1):e000829. doi: 10.1136/bmjdrc-2019-000829 (PMC6936585; doi:10.1136/bmjdrc-2019-000829), 2019-12-17
Supplement: bmjdrc-2019-000829supp003.pdf [file bmjdrc-2019-000829supp003.pdf]

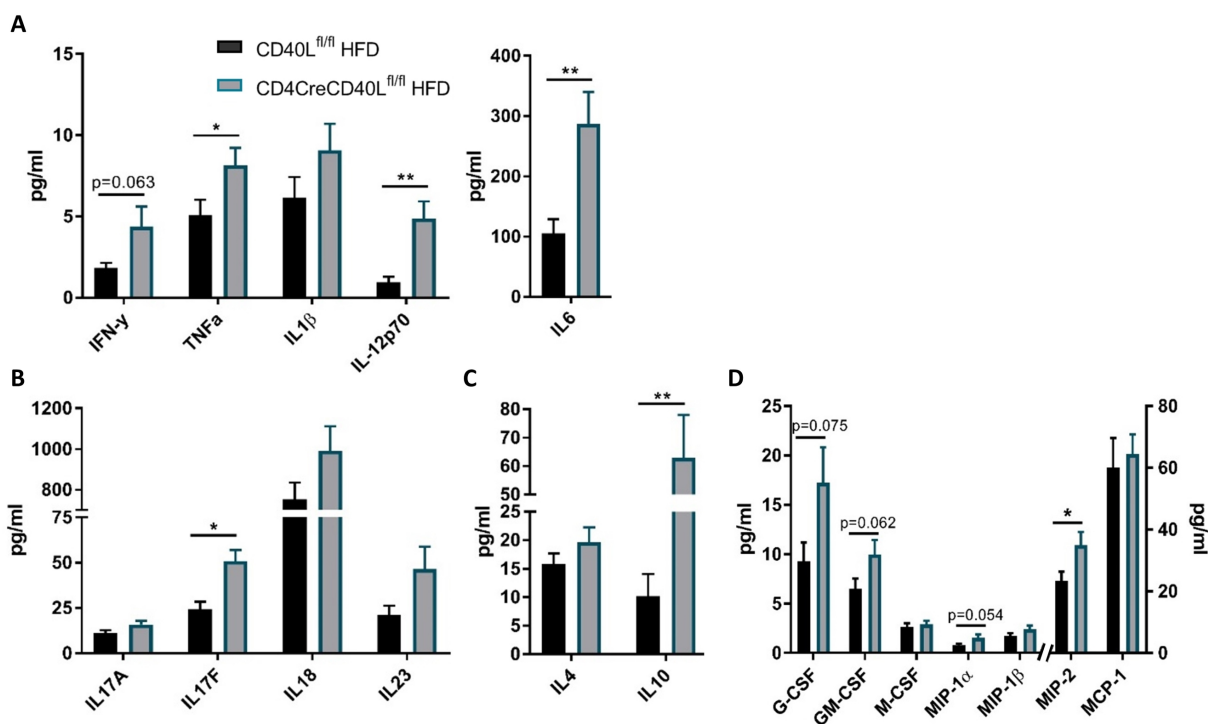

**Figure S5A. Analysis of inflammatory markers in plasma of HFD mice (A-C)** Plasma Luminex of pro- and anti-inflammatory cytokines. **(D)** Plasma Luminex of macrophage inflammatory cytokines and chemokines. Data represented as HFD (n=14 and 15/group) with mean  $\pm$  SEM. \* =  $P < 0.05$ , \*\* =  $P < 0.01$

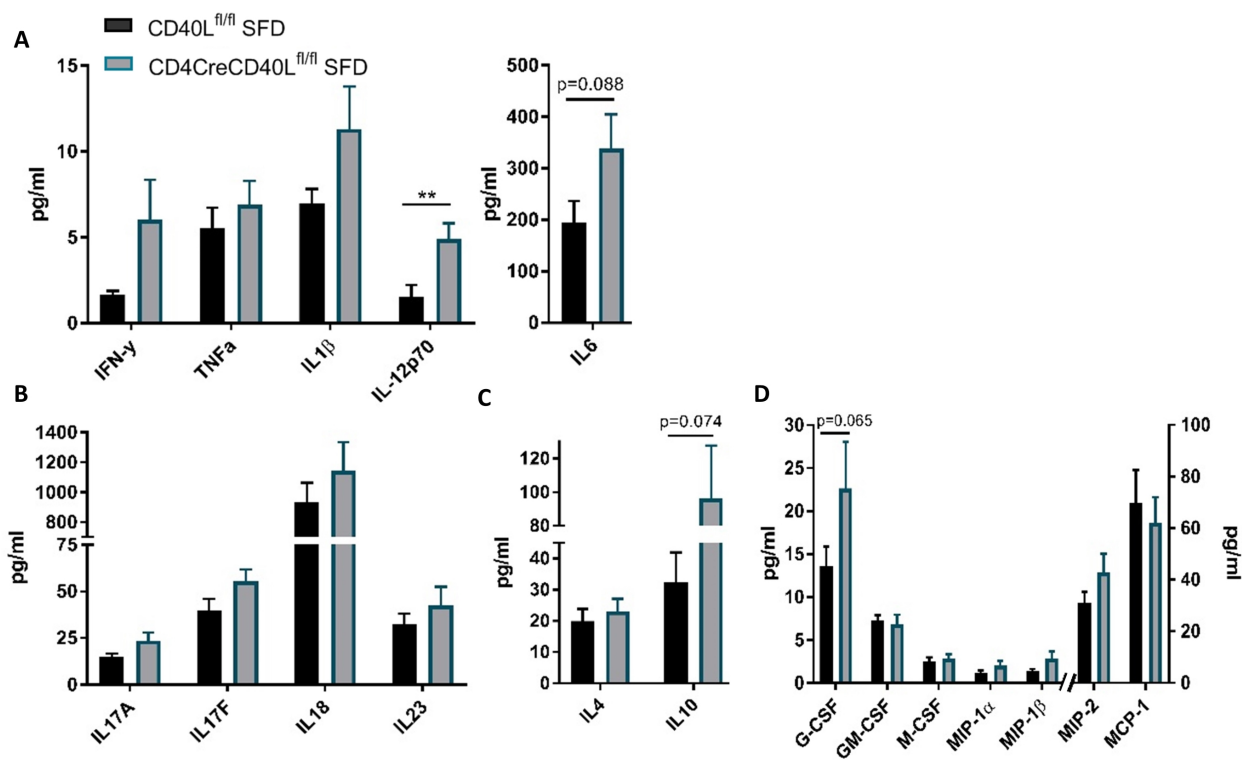

**Figure S5B. Analysis of inflammatory markers in plasma of SFD mice (A-C)** Plasma Luminex of pro- and anti-inflammatory cytokines. **(D)** Plasma Luminex of macrophage inflammatory cytokines and chemokines. Data represented as SFD (n=8/group) with mean  $\pm$  SEM. \* =  $P < 0.05$ , \*\* =  $P < 0.01$
