# Supplementary material for: Deficiency of T cell CD40L has minor beneficial effects on obesity-induced metabolic dysfunction
Source: PubMed Central journal article supplement — BMJ Open Diabetes Res Care. 2019 Dec 17;7(1):e000829. doi: 10.1136/bmjdrc-2019-000829 (PMC6936585; doi:10.1136/bmjdrc-2019-000829), 2019-12-17
Supplement: bmjdrc-2019-000829supp004.pdf [file bmjdrc-2019-000829supp004.pdf]

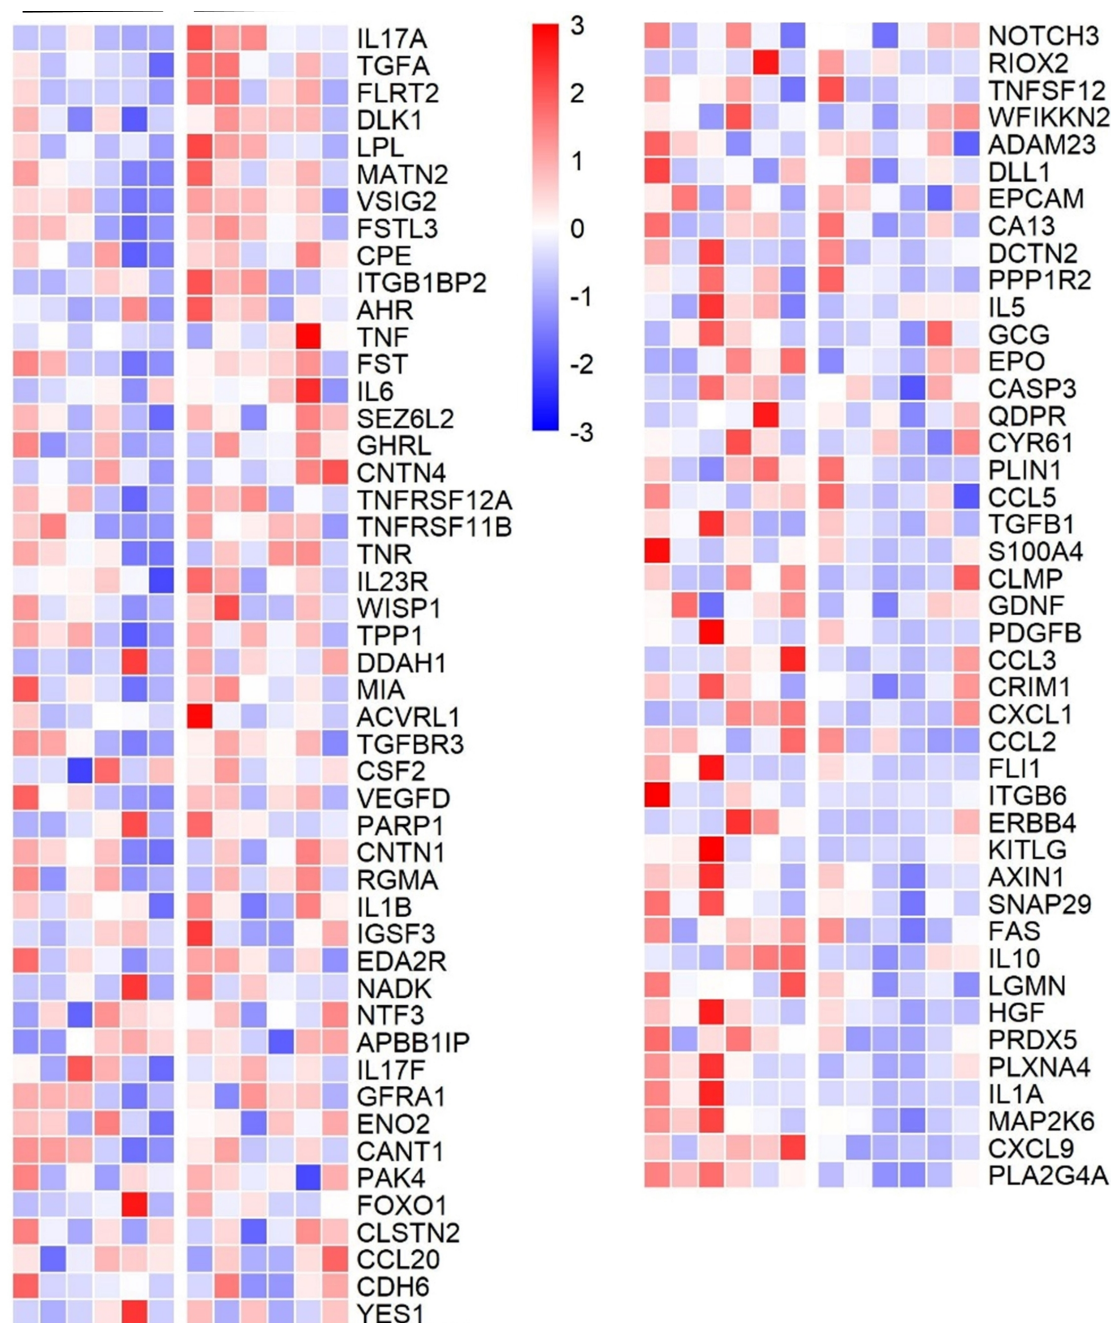

**Figure S6. Analysis of 92 proteins in plasma of CD4CreCD40L<sup>fl/fl</sup> and CD40L<sup>fl/fl</sup> WT mice show no significant changes.** Heatmap of Olink Proteomics platform showing the fold row Z-score between the CD4CreCD40L<sup>fl/fl</sup> and the CD40L<sup>fl/fl</sup> WT mice. Data was analysed with a two-way ANOVA and Sidaks multiple correction test. (n=6 mice/ group)

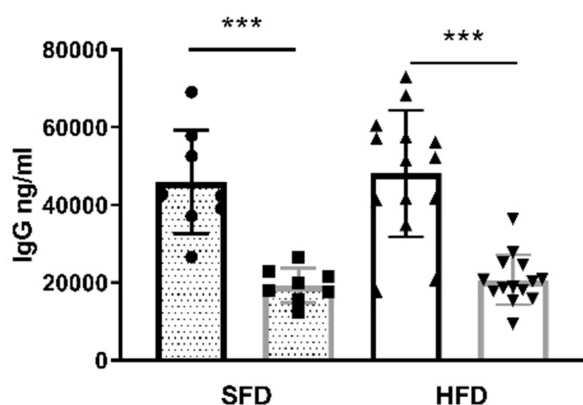

**Figure S7. Total plasma IgG antibodies are decreased in SFD and HFD fed**
